# Supplementary material for: Recurrence-Associated Long Non-coding RNA Signature for Determining the Risk of Recurrence in Patients with Colon Cancer
Source: PubMed Central journal article supplement — Mol Ther Nucleic Acids. 2018 Jun 26;12:518–29. doi: 10.1016/j.omtn.2018.06.007 (PMC6076224; doi:10.1016/j.omtn.2018.06.007), 2018-06-26
Supplement: mmc1.pdf [file mmc1.pdf]

**OMTN, Volume 12**

**Supplemental Information**

**Recurrence-Associated Long Non-coding RNA  
Signature for Determining the Risk of Recurrence  
in Patients with Colon Cancer**

**Meng Zhou, Long Hu, Zicheng Zhang, Nan Wu, Jie Sun, and Jianzhong Su**

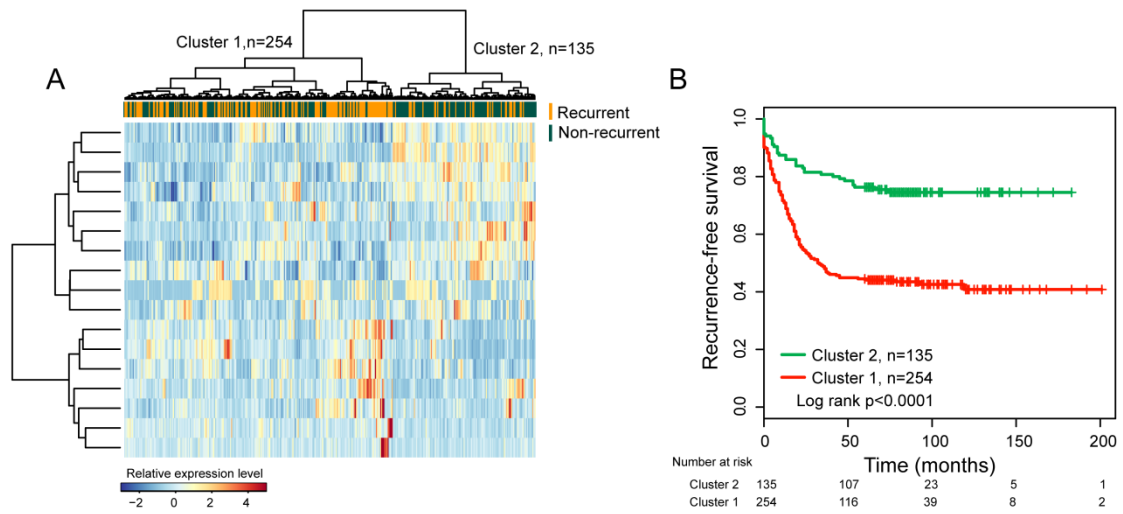

**Supplemental Figure S1.** (A) Unsupervised clustering of patients based on the expression pattern of 17 recurrence-associated lncRNAs. (B) Kaplan-Meier estimates of the recurrence-free survival of patients in the two sample clusters based on 17 recurrence-associated lncRNAs.

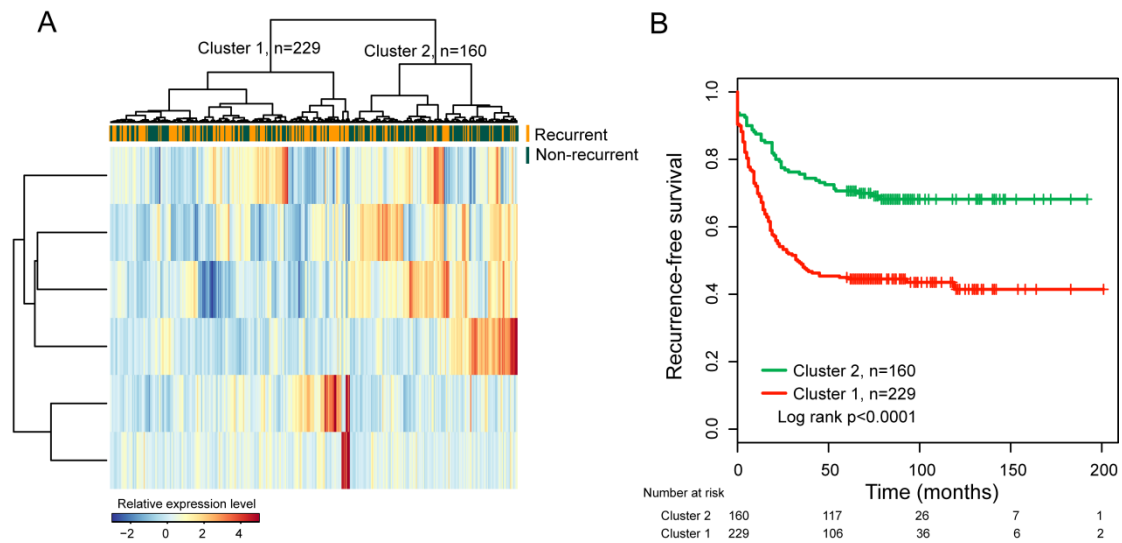

**Supplemental Figure S2.** (A) Unsupervised clustering of patients based on the expression pattern of six lncRNAs in the signature. Recurrence. (B) Kaplan-Meier estimates of the recurrence-free survival of patients in the two sample clusters based on six lncRNAs in the signature.

**Supplemental Table S1. Clinical characteristics of patients with colon cancer in the six datasets**

| Characteristics                   | Discovery dataset | GSE39582 dataset | GSE14333 dataset | GSE17538 dataset | GSE33113 dataset | TCGA dataset |
|-----------------------------------|-------------------|------------------|------------------|------------------|------------------|--------------|
| No. of patients                   | 389               | 574              | 226              | 200              | 89               | 391          |
| Age (years)                       |                   |                  |                  |                  |                  |              |
| Range                             | 30.2-97           | 22-97            | 26-92            | 23-94            | 34-95            | 31-90        |
| Median                            | 68                | 68.1             | 67               | 66               | 73               | 67           |
| Gender                            |                   |                  |                  |                  |                  |              |
| Female                            | 175               | 257              | 120              | 98               | 47               | 181          |
| Male                              | 214               | 317              | 106              | 102              | 42               | 210          |
| Stage                             |                   |                  |                  |                  |                  |              |
| I/II                              | 196               | 304              | 135              | 134              | 89               | 227          |
| III/IV                            | 193               | 266              | 91               | 66               | 0                | 155          |
| Unknown                           |                   | 4                |                  |                  |                  | 9            |
| Recurrence                        |                   |                  |                  |                  |                  |              |
| Yes                               | 179               | 179              | 50               | 55               | 18               | 89           |
| No                                | 210               | 395              | 176              | 145              | 71               | 302          |
| Recurrence-free survival (months) |                   |                  |                  |                  |                  |              |
| Range                             | 0-201             | 0-201            | 0.9-142.6        | 0-142.6          | 1.8-120          | 0-147.9      |
| Median                            | 65                | 44.5             | 38.5             | 39               | 39.5             | 21.3         |
